# Supplementary material for: Affinity maturation and fine functional mapping of an antibody fragment against a novel neutralizing epitope on human vascular endothelial growth factor
Source: Royal Society of Chemistry journal article supplement (doi:10.1039/c3mb70136k), 2013-05-16

Figure S1: Recognition of monomeric/dimeric forms of hVEGF by anti-VEGF antibody fragments. Monomers and dimers of GST-hVEGF were separated by size-exclusion chromatography using a TSK G3000 PW column. Microtiter plates coated with monomeric or dimeric GST-hVEGF were incubated with phage-displayed L3H6 or 3C1 scFv. The latter was used as a positive control of monomeric VEGF recognition. Bound phages were detected with an anti-M13 mAb conjugated to horseradish peroxidase.

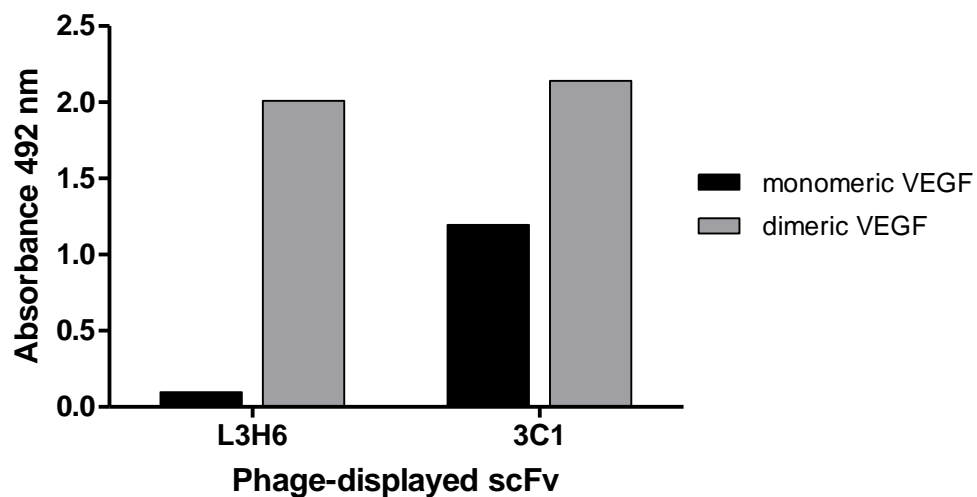

Supplement: c3mb70136k.pdf [file c3mb70136k.pdf]
